# Supplementary material
Source: Royal Society of Chemistry journal article supplement (doi:10.1039/d6gc02458k)
Supplement: d6gc02458k1.pdf [file d6gc02458k1.pdf]

## Design of mediator-based deep eutectic solvent for targeted modulation of lignin structure for the lignin-enhanced multifunctional gels and fermentable sugar

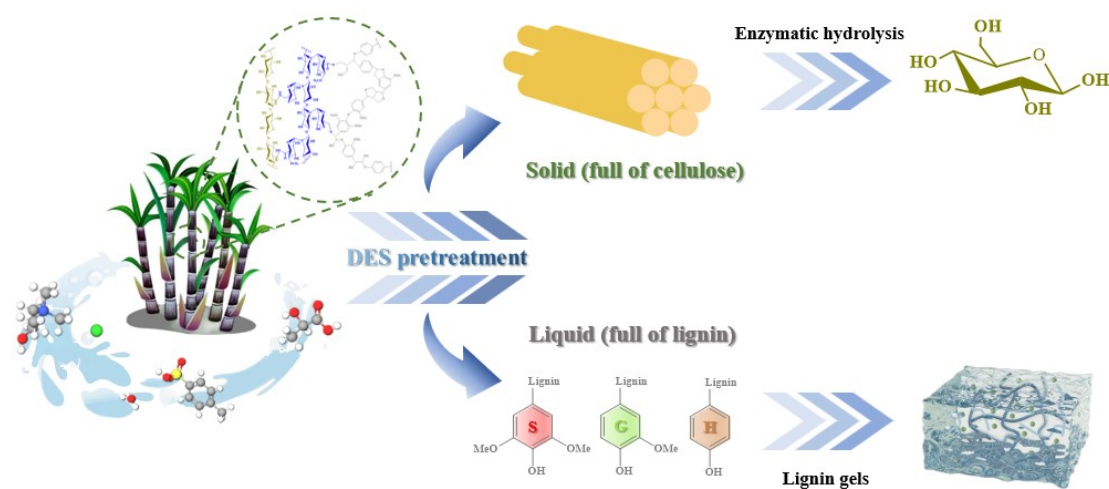

**Fig. S1.** The experimental procedure scheme.

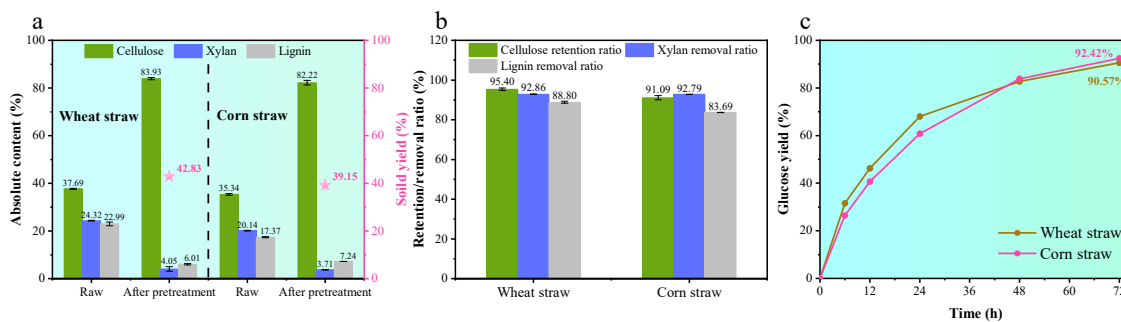

**Fig. S2.** The broad applicability of *p*-TsOH-mediated DES. (a) Chemical components.

(b) Retention or removal ratio. (c) Enzymatic hydrolysis efficiency.

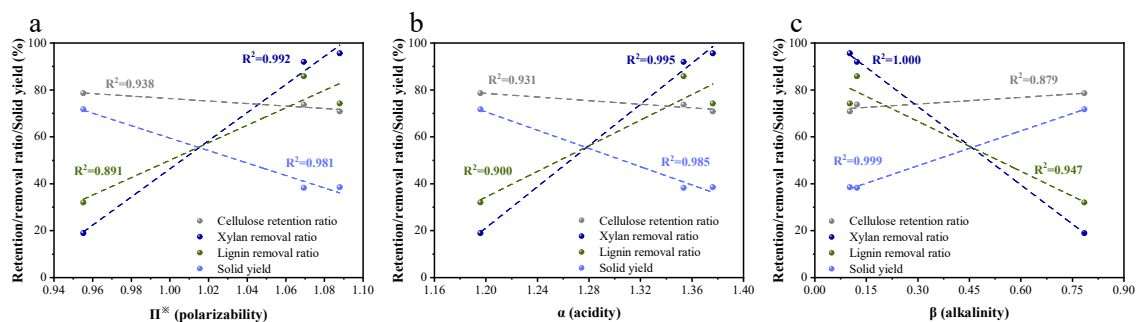

**Fig. S3.** The relationship between the K-T parameter of DES and the composition of residue (Cellulose retention ratio, xylan removal ratio, lignin removal ratio, solid yield).

(a) $\pi^*$ . (b) $\alpha$ . (c) $\beta$ .

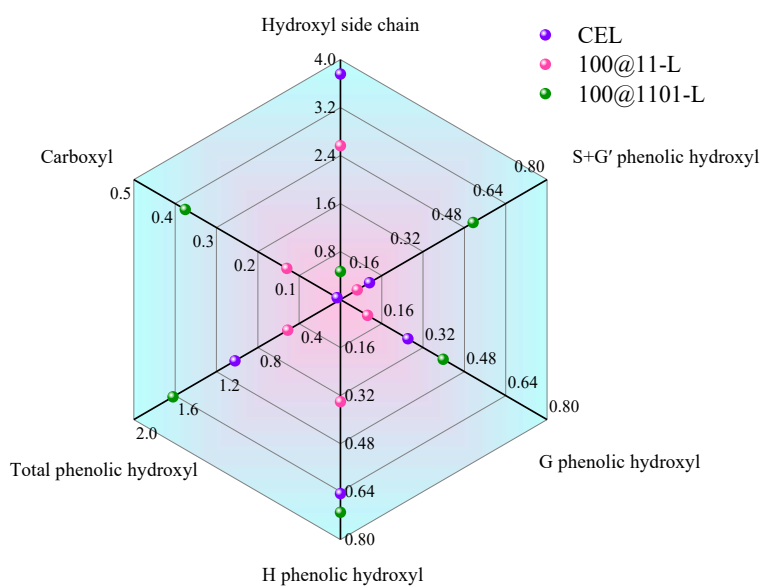

**Fig. S4.**  $^{31}\text{P}$  NMR of regenerated lignin by *p*-TsOH-mediated DES.

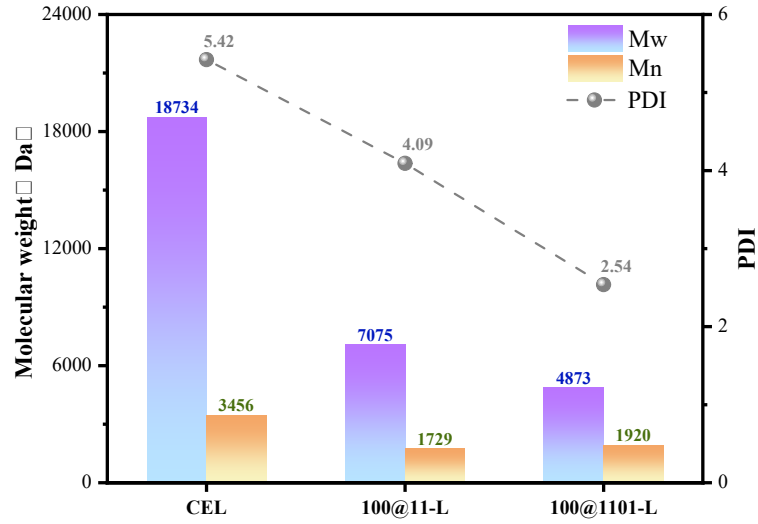

Fig. S5. GPC of regenerated lignin by *p*-TsOH-mediated DES.

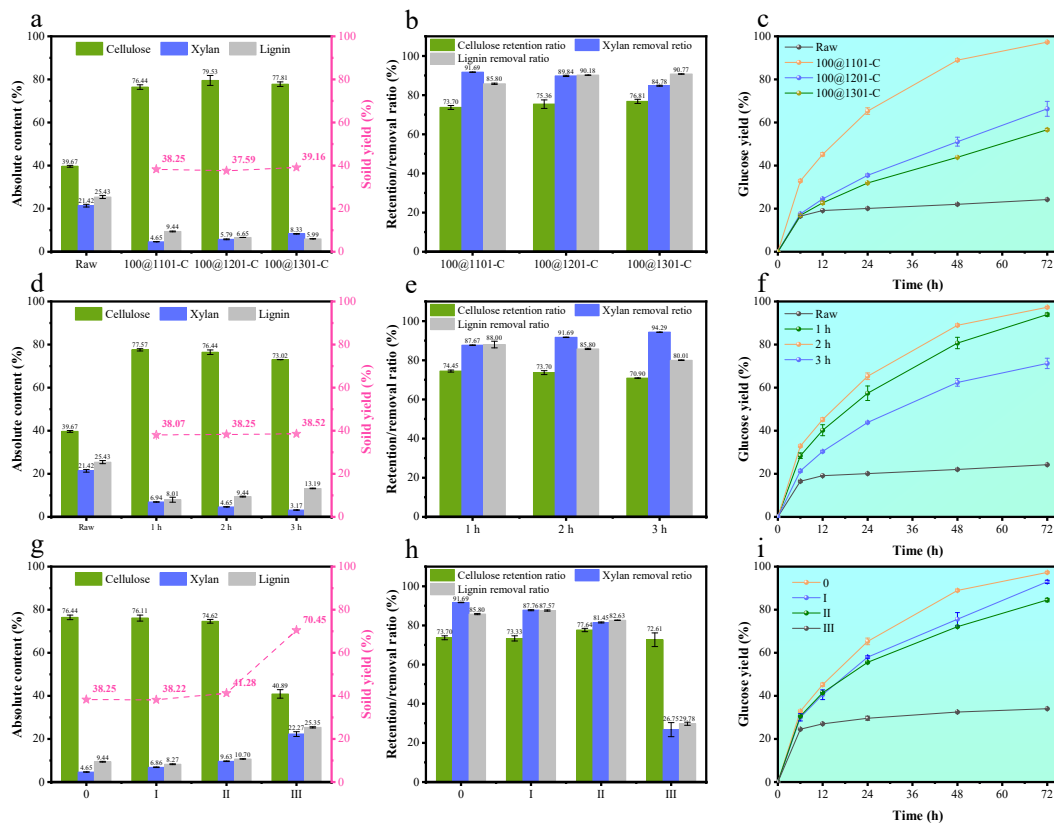

Fig. S6. Optimization of pretreatment parameters. (a-c) Different pretreatment molar ratios. (d-f) Different pretreatment time. (g-i) Different pretreatment cycle times.

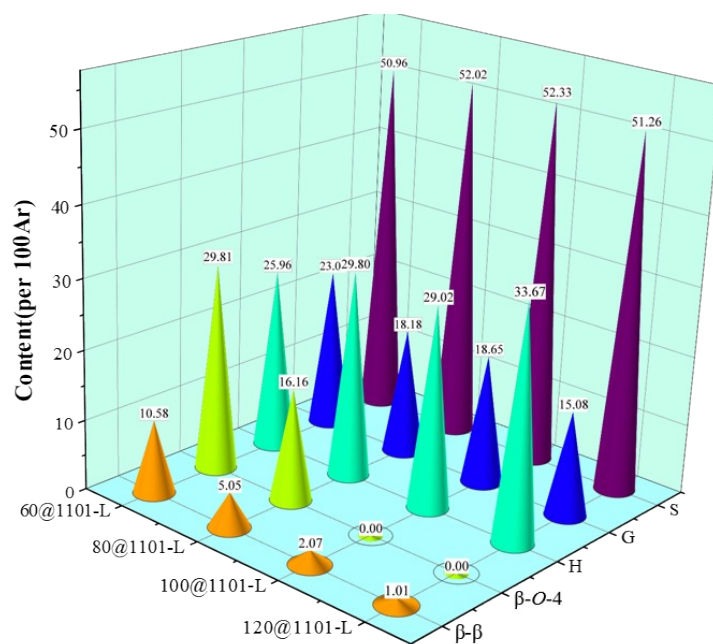

**Fig. S7.** 2D-HSQC NMR of regenerated lignin in different pretreatment temperature.

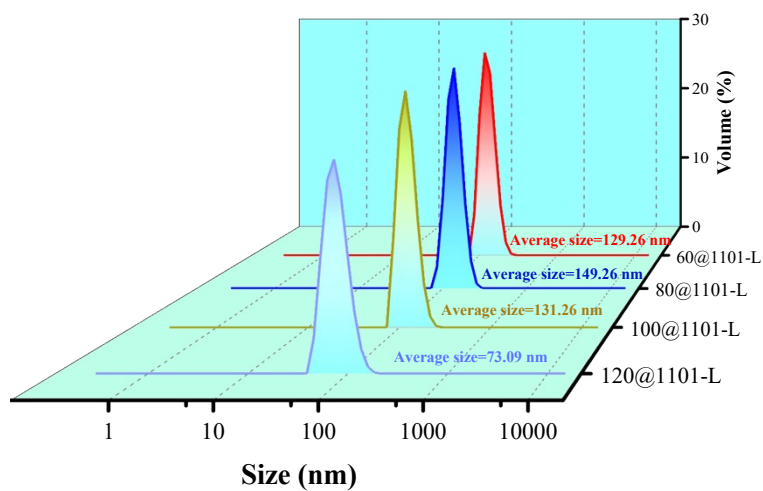

**Fig. S8.** The nanoparticle sizes of different regenerated lignin in DMSO.

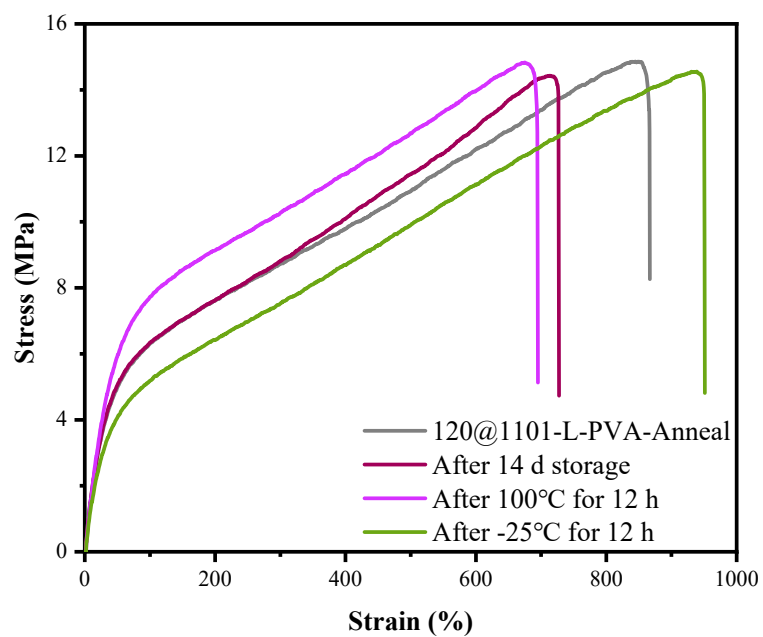

**Fig. S9.** Harsh environment testing of lignin gels.

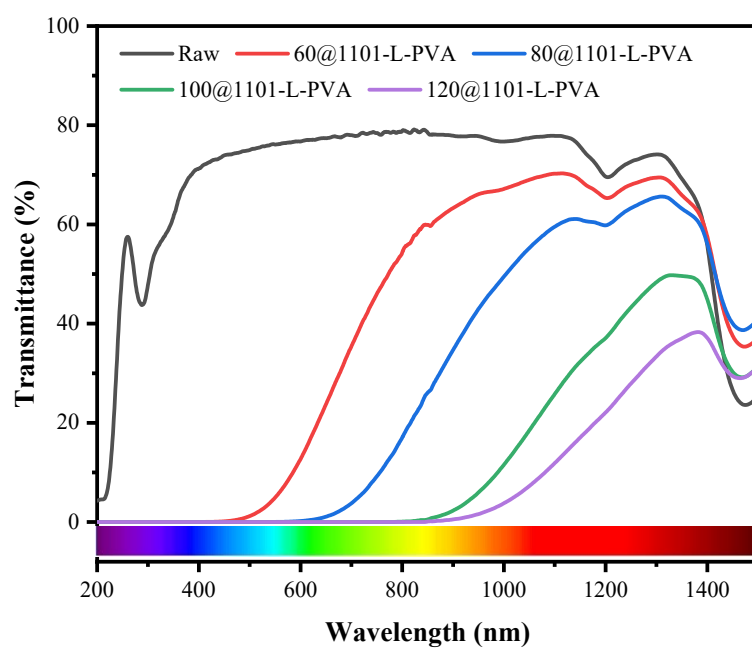

**Fig. S10.** Ultraviolet-visible-near infrared transmittance spectra of different lignin gels.
